# Supplementary material for: Use of Natural Language Processing of Patient-Initiated Electronic Health Record Messages to Identify Patients With COVID-19 Infection
Source: PubMed Central journal article supplement (PMC10329205; doi:10.1001/jamanetworkopen.2023.22299), 2023-07-07
Supplement: jamanetwopen-e2322299-s001.pdf [file jamanetwopen-e2322299-s001.pdf]

## Data Sharing Statement

Mermin-Bunnell. Use of Natural Language Processing of Patient-Initiated Electronic Health Record Messages to Identify Patients With COVID-19 Infection. *JAMA Netw Open*. Published July 07, 2023. doi:10.1001/jamanetworkopen.2023.22299

### Data

**Data available:** No

### Additional Information

**Explanation for why data not available:** It is extremely difficult to fully deidentify free text and as such it is not allowed by our institution.
